# Supplementary material for: Combining transcriptomic and metabolomic insights to guide the clinical application of adipose- and bone marrow-derived mesenchymal stem cells
Source: publisher site journal article supplement (doi:10.1515/mr-2024-0056), 2024-08-28
Supplement: Supplementary file 1 [file j_mr-2024-0056_suppl_001.docx]

| **Cell source** | **Cell passage** | **Subpopulations** | **Characteristics** | **References** |
| --- | --- | --- | --- | --- |
| ADSCs | 3 | 1 | May relate with microenvironment maintenance | Qu et al. (1) |
| 2 | Directly participate in ossification |
| 3 | Directly participate in ossification |
| 4 | May relate with endochondral ossification |
| ADSCs | 5 | 1 | Multipotential differentiation cells | Liang et al. (2) |
| 2 | Self-regulatory cells |
| 3 | Self-renewal cells |
| 4 | Immunoregulatory cells |
| 5 | Metabolism and hematopoiesis associated cells |
| BMSCs | 6,7 | 1 | Stem-like active proliferative cell | Zhang et al. (3) |
| 2 | Tripotent multipotent MPCs |
| 3 | Unipotent preadipocytes |
| 4 | Bipotent prechondro-osteoblasts |
| 5 | Immunoregulatory prechondrocytes |
| 6 | Pre-smooth muscle cells |
| BMSCs | 1 | 1 | Stemness subpopulation | Xie et al. (4) |
| 2 | Functional subpopulation |
| 3 | Proliferative subpopulation |
| 4 | Proliferative subpopulation |
| 5 | Monocytes/macrophages |
| 6 | Monocytes/macrophages |
| 3 | 1 | Stemness subpopulation |
| 2 | Proliferative subpopulation |
| 3 | Functional subpopulation |
| 4 | Proliferative subpopulation |
| 5 | Proliferative subpopulation |
| 6 | Senescent cells |
| 7 | Monocytes/macrophages |
| ADSCs and BMSCs | 1 | 1 | Tissue conserved | Wang et al. (5) |
| 2 |
| 3 |
| 4 |
| 5 |
| 6 | ADSC specific |
| 7 |
| 8 | BMSC specific |
| ADSCs and BMSCs | ADSC: 3; BMSC: Telomerase-immortalized | 1 | Chondrocyte lineage MSCs | Hou et al. (6) |
| 2 | Adipocyte/myocyte lineage MSCs |
| 3 | Osteocyte lineage MSCs |

Table S1. Summary of studies on the heterogeneity within cultured ADSCs and BMSCs

| **Reference** |
| --- |
| 1.Qu R, He K, Fan T, Yang Y, Mai L, Lian Z, et al. Single-cell transcriptomic sequencing analyses of cell heterogeneity during osteogenesis of human adipose-derived mesenchymal stem cells. Stem Cells. 2021;39(11):1478-88. |
| 2.Liang Z-X, Liu H-S, Xiong L, Zeng Z-W, Zheng X-B, Kang L, et al. GAS6 From CD200(+) Adipose-Derived Stem Cells Mitigates Colonic Inflammation in a Macrophage-Dependent Manner. Journal of Crohns & Colitis. 2023;17(2):289-301. |
| 3.Zhang C, Han X, Liu J, Chen L, Lei Y, Chen K, et al. Single-cell Transcriptomic Analysis Reveals the Cellular Heterogeneity of Mesenchymal Stem Cells. Genomics Proteomics Bioinformatics. 2022;20(1):70-86. |
| 4.Xie Z, Yu W, Ye G, Li J, Zheng G, Liu W, et al. Single-cell RNA sequencing analysis of human bone-marrow-derived mesenchymal stem cells and functional subpopulation identification. Exp Mol Med. 2022;54(4):483-92. |
| 5.Wang Z, Chai C, Wang R, Feng Y, Huang L, Zhang Y, et al. Single-cell transcriptome atlas of human mesenchymal stem cells exploring cellular heterogeneity. Clin Transl Med. 2021;11(12):e650. |
| 6.Hou W, Duan L, Huang C, Li X, Xu X, Qin P, et al. Cross-Tissue Characterization of Heterogeneities of Mesenchymal Stem Cells and Their Differentiation Potentials. Front Cell Dev Biol. 2021;9:781021. |
