# Supplementary material for: Combining transcriptomic and metabolomic insights to guide the clinical application of adipose- and bone marrow-derived mesenchymal stem cells
Source: publisher site journal article supplement (doi:10.1515/mr-2024-0056), 2024-08-28
Supplement: Supplementary file 2 [file j_mr-2024-0056_suppl_002.docx]

Table S2. Summary of studies on the heterogeneity within uncultured ADSCs and BMSCs

|  | **Species** | **Cell isolation strategy** | **Subpopulations** | **Characteristics** | **Marker genes** | **Cell isolation strategy for in vitro verification** | **References** |
| --- | --- | --- | --- | --- | --- | --- | --- |
| **Adipose** | Mice | Lin-CD29+CD34+SCA1+ | P1 | Stem like progenitors | Cd55, Il13ra1, Cd34, Ly6a, Pi16, Dpp4 | Lin-SCA1+CD55+ | Schwalie et al. (1) |
| P2 | Adipo-primed progenitors | Aoc3 (Vap1), Adam12, Pparg, Fabp4, Icam1, Ggt5 | Lin-SCA1+VAP1+ |
| P3 | Adipogenesis-regulatory cells | Cd142, Abcg1, Mgp, Bgn, Dkk3, Dcn | Lin-SCA1+CD142+ |
| Mice | Lin- | ACS1 | Adipo-primed progenitors | Icam1, Bgn, Apoe |  | Burl et al. (2) |
| ACS2 | Stem like progenitors | Cd55, Pi16, Dpp4 |  |
| Prolif. ASC | Proliferation/differentiation prigenitors | Mki67, cell cycle related genes |  |
| Mice | CD45- | Group 1 | Interstitial Progenitor | Dpp4, Cd55, Pi16 | CD142-ICAM1-DPP4+ | Merrick et al. (3) |
| Group 2 | Committed Preadipocyte | Icam1, Apoe, Ggt5, Fabp4, Pparg | CD142-DPP4-ICAM1+ |
| Group 3 | Cd142+ | CD142, Fmo2, Vit, Ifitm1, Gdf10 | CD142+ |
| Human | CD45- | Group 1 | Interstitial Progenitor | Dpp4, CD55, PI16 |  |
| Group 2 | Committed Preadipocyte | Icam1, Ggt5, Apoe, Vcam1 |  |
| Human | All SVF cells | SP1 | Pre-adipocyte | MGP, APOE, ICAM1 |  | Vijay et al. (4) |
| SP2 | More mature adipocyte progenitor | FABP4, CFD |  |
| SP3 | Pre-adipocyte | Ribosome related genes |  |
| SP4 | Fibrosis and ECM related | CD55, PI16 |  |
| **Bone marrow** | Mice | Lin-LEPR+ | P1 | Adipo-primed | Mgp, Esm1, Vcam1 | LEPR+VCAM1+CD63- | Tikhonova et al. (5) |
| P2 | Adipo-primed | Lpl, Esm1, Vcam1 |
| P3 | Osteo-primed | Wif1, CD200, CD63 | LEPR+VCAM1-CD63+ |
| P4 | Osteo-primed | Spp1, CD200, CD63 |
| Mice | Lin- | P3 | Multipotent stromal cells | Lepr, Prrx1, Adipoq | CD276-CX3CI1+ | Wolock et al. (6) |
| P2 | Adipocyte progenitor | Cebpb, Junb, Fosb | CD54+ENPP1- |
| P1 | Pre-adipocyte |
| P4 | Osteoblast/Chondrocyte progenitor | Sp7, Alpl | CD276+CX3CI1- |
| P5 | Pre-osteoblast/chondrocyte |
| P6 | Pro-osteoblast | Bglap, Col1a1, Col1a2 | CD54-ENPP1+ |
| Mice | Col2-cre | EMP | Early mesenchymal progenitors | Ly6a, Cd34, Thy1, Mfap5, Gsn, Clec3b |  | Zhong et al. (7) |
| IMP | Intermediate mesenchymal progenitors |  |  |
| LMP | Late mesenchymal progenitors | Aspn, Edil3, Tnn, Postn, Ostn, Dkk3 |  |
| LCP | Lineage committed progenitors |  |  |
| OB | Osteoblast | Sp7, Runx2, Col1a1, Ibsp, Bglap2, Dmp1 |  |
| Ocy | Osteocyte |  |
| AD | Adipocyte | Cebpa, Cebpb, Pparg, Lpl, Adipoq, Apoe |  |
| Human | CD271+ (NGFR) | C1 | Osteoblast precursor | COL1A1, ALPL, CD146 |  | Wang et al. (8) |
| C2 | Adipocyte precursor | ADPQ, MGP, APOD |  |
| C3 | Terminal 1 | Elusive |  |
| C4 | Terminal 2 |  |
| C6 | Chondrocyte precursor | CD56, WIF1, OMD |  |
| Mice | Lin- | MSC | MSC-1: Adipogenic | Lepr, Pdgfrb, Cxcl12, Kitl, Mgp |  | Leimkühler et al. (9) |
| MSC-2: Osteogenic | Lepr, Pdgfrb, Cxcl12, Kitl, Wif1 |  |
| MSC-3: Transitioning | Lepr, Pdgfrb, Cxcl12, Kitl, Neat1 |  |
| MSC-4: IFN high | Lepr, Pdgfrb, Cxcl12, Kitl, Cxcl9 |  |
| Schwann Cell Progenitors | Non-Myelinating | Mog, Mal, Sox10, Mobp |  |
| Myelinating |  |
| Osteo-lineage Cells | Osteoblast Like | Sp7, Bglap, Bglap2, Alpl |  |
| Arterial Cells | Arterial Fibroblasts | Cd34, Ly6a, Ly6c1, Sparcl1 |  |

| **Reference** |
| --- |
| 1. Schwalie PC, Dong H, Zachara M, Russeil J, Alpern D, Akchiche N, et al. A stromal cell population that inhibits adipogenesis in mammalian fat depots. Nature. 2018;559(7712):103-+. |
| 2. Burl RB, Ramseyer VD, Rondini EA, Pique-Regi R, Lee YH, Granneman JG. Deconstructing Adipogenesis Induced by beta3-Adrenergic Receptor Activation with Single-Cell Expression Profiling. Cell Metab. 2018;28(2):300-9 e4. |
| 3. Merrick D, Sakers A, Irgebay Z, Okada C, Calvert C, Morley MP, et al. Identification of a mesenchymal progenitor cell hierarchy in adipose tissue. Science. 2019;364(6438). |
| 4. Vijay J, Gauthier MF, Biswell RL, Louiselle DA, Johnston JJ, Cheung WA, et al. Single-cell analysis of human adipose tissue identifies depot and disease specific cell types. Nat Metab. 2020;2(1):97-109. |
| 5. Tikhonova AN, Dolgalev I, Hu H, Sivaraj KK, Hoxha E, Cuesta-Dominguez A, et al. The bone marrow microenvironment at single-cell resolution. Nature. 2019;569(7755):222-8. |
| 6. Wolock SL, Krishnan I, Tenen DE, Matkins V, Camacho V, Patel S, et al. Mapping Distinct Bone Marrow Niche Populations and Their Differentiation Paths. Cell Rep. 2019;28(2):302-11 e5. |
| 7. Zhong L, Yao L, Tower RJ, Wei Y, Miao Z, Park J, et al. Single cell transcriptomics identifies a unique adipose lineage cell population that regulates bone marrow environment. Elife. 2020;9. |
| 8. Wang Z, Li X, Yang J, Gong Y, Zhang H, Qiu X, et al. Single-cell RNA sequencing deconvolutes the in vivo heterogeneity of human bone marrow-derived mesenchymal stem cells. Int J Biol Sci. 2021;17(15):4192-206. |
| 9. Leimkuhler NB, Gleitz HFE, Ronghui L, Snoeren IAM, Fuchs SNR, Nagai JS, et al. Heterogeneous bone-marrow stromal progenitors drive myelofibrosis via a druggable alarmin axis. Cell Stem Cell. 2021;28(4):637-52 e8. |
