# Supplementary material for: Combining transcriptomic and metabolomic insights to guide the clinical application of adipose- and bone marrow-derived mesenchymal stem cells
Source: publisher site journal article supplement (doi:10.1515/mr-2024-0056), 2024-08-28
Supplement: Supplementary file 3 [file j_mr-2024-0056_suppl_003.docx]

Table S3. Summary of secretomics studies of ADSCs and BMSCs

| **Species** | **Metabolomics analytical techniques** | **Substances** | **Characteristics** | **Verification** | **References** |
| --- | --- | --- | --- | --- | --- |
| Mice | LC-MS of CM | Proteomic | ADSCs of visceral fat: Showing detoxification activity in response to toxic substances and drugs |  | Ayaz-Guner et al. (1) |
| ADSCs of subcutaneous fat: Facilitating chondrogenesis, osteogenesis, and angiogenesis |
| BMSCs: Remodeling extracellular matrix structures, such as those containing glycosaminoglycans |
| Human | LC-MS of CM | Proteomic | BMSCs CM might be the most advantageous choice for a therapy designed to reduce oxidative stress | Both CM of ADSCs and BMSCs induced neural progenitor cells differentiation towards the neuronal phenotype; CM of ADSCs demonstrated higher potential in promoting axonal growth | Pires et al. (2), Assunção-Silva et al. (3) |
| ADSCs CM was more beneficial in the protection against excitotoxicity |
| Human | Targeted protein array of CM | Growth factors and inflammation mediators | BMSCs CM was counteracted by higher levels of various immunomodulatory mediators |  | Luca et al. (4) |
| Human | LC-MS of CM | Lipidomics | Higher levels of lipids were found in BMSCs CM, these lipids show both pro-inflammatory and anti-inflammatory activity |  | Casati et al. (5) |
| LC-MS of EV |
| Human | miRNA array of EV | miRNA | ADSCs EV: hsa-miR-143-3p, hsa-miR-124-3p | Reduce cardiac hypertrophy: The ADSCs EV were more effective in reducing the protein expressions of hypertrophic and inflammatory markers, while BMSCs EV in reducing the gene expressions of transcription factors. | Constantin et al. (6) |
| BMSCs EV: hsa-miR-146a-5p, hsa-miR-93a-5p |
| Human | LC-MS/MS of CM | Peptides | Proteins related to antiapoptotic activity were identified in ADSCs CM |  | Shin et al. (7) |
| Proteins related to tissue development and remodeling and chemotaxis were abundant in BMSCs CM |
| Human | Cytokine and chemokines arrays of EV | Cytokine and chemokines | ADSCs EV overexpressed pro-angiogenic factors in comparison to the BMSC-counterpart | ADSCs EV were able to induce a significant increase in endothelial cord outgrowth; | Gorgun et al. (8) |
| BMSCs EV contained a higher amount of pro-differentiation and chemotactic proteins | BMSCs EV were able to prompt growth plate organization |
| Human | Cytokine assay of CM | Angiogenic factors and neurotrophic factors | ADSCs secrete more neurovascular factors under extreme environmental stimulation |  | Binch et al. (9) |
| Human | miRNA array of EV | miRNA | ADSCs EV were highly correlated to angiogenesis | ADSCs EV, but not BMSCs EV, promote wound healing on a murine model of diabetic wounds | Pomatto et al. (10) |
| protein dataset of EV | Protein | BMSCs EV were preferentially involved in cellular proliferation |

LC-MS: Liquid chromatography–mass spectrometry; CM: Conditioned media; EV: Extracellular vesicles

| **Reference** |
| --- |
| 1. Ayaz-Guner S, Alessio N, Acar MB, Aprile D, Ozcan S, Di Bernardo G, et al. A comparative study on normal and obese mice indicates that the secretome of mesenchymal stromal cells is influenced by tissue environment and physiopathological conditions. Cell Commun Signal. 2020;18(1):118. |
| 2. Pires AO, Mendes-Pinheiro B, Teixeira FG, Anjo SI, Ribeiro-Samy S, Gomes ED, et al. Unveiling the Differences of Secretome of Human Bone Marrow Mesenchymal Stem Cells, Adipose Tissue-Derived Stem Cells, and Human Umbilical Cord Perivascular Cells: A Proteomic Analysis. Stem Cells Dev. 2016;25(14):1073-83. |
| 3. Assuncao-Silva RC, Mendes-Pinheiro B, Patricio P, Behie LA, Teixeira FG, Pinto L, et al. Exploiting the impact of the secretome of MSCs isolated from different tissue sources on neuronal differentiation and axonal growth. Biochimie. 2018;155:83-91. |
| 4. De Luca P, Kouroupis D, Vigano M, Perucca-Orfei C, Kaplan L, Zagra L, et al. Human Diseased Articular Cartilage Contains a Mesenchymal Stem Cell-Like Population of Chondroprogenitors with Strong Immunomodulatory Responses. J Clin Med. 2019;8(4). |
| 5. Casati S, Giannasi C, Niada S, Della Morte E, Orioli M, Brini AT. Lipidomics of Cell Secretome Combined with the Study of Selected Bioactive Lipids in an In Vitro Model of Osteoarthritis. Stem Cells Transl Med. 2022;11(9):959-70. |
| 6. Constantin A, Comarita IK, Alexandru N, Filippi A, Bojin F, Gherghiceanu M, et al. Stem cell-derived extracellular vesicles reduce the expression of molecules involved in cardiac hypertrophy-In a model of human-induced pluripotent stem cell-derived cardiomyocytes. Front Pharmacol. 2022;13:1003684. |
| 7. Shin S, Lee J, Kwon Y, Park KS, Jeong JH, Choi SJ, et al. Comparative Proteomic Analysis of the Mesenchymal Stem Cells Secretome from Adipose, Bone Marrow, Placenta and Wharton's Jelly. Int J Mol Sci. 2021;22(2). |
| 8. Gorgun C, Palama MEF, Reverberi D, Gagliani MC, Cortese K, Tasso R, et al. Role of extracellular vesicles from adipose tissue- and bone marrow-mesenchymal stromal cells in endothelial proliferation and chondrogenesis. Stem Cells Transl Med. 2021;10(12):1680-95. |
| 9. Binch ALA, Richardson SM, Hoyland JA, Barry FP. Combinatorial conditioning of adipose derived-mesenchymal stem cells enhances their neurovascular potential: Implications for intervertebral disc degeneration. JOR Spine. 2019;2(4):e1072. |
| 10. Pomatto M, Gai C, Negro F, Cedrino M, Grange C, Ceccotti E, et al. Differential Therapeutic Effect of Extracellular Vesicles Derived by Bone Marrow and Adipose Mesenchymal Stem Cells on Wound Healing of Diabetic Ulcers and Correlation to Their Cargoes. Int J Mol Sci. 2021;22(8). |
