# Supplementary material for: Combining transcriptomic and metabolomic insights to guide the clinical application of adipose- and bone marrow-derived mesenchymal stem cells
Source: publisher site journal article supplement (doi:10.1515/mr-2024-0056), 2024-08-28
Supplement: Supplementary file 4 [file j_mr-2024-0056_suppl_004.docx]

Table S4. Commercialized ADSCs and BMSCs products approved worldwide

|  | **Products** | **Compositions** | **Indications** | **Year** | **Country** |
| --- | --- | --- | --- | --- | --- |
| ADSCs products | Queencell | Autogenous SVF | Subcutaneous tissue defect | 2010 | Korea |
| Cupistem | Autogenous ADSCs | Crohn’s Fistula | 2012 | Korea |
| Astrostem | Autogenous ADSCs | Autoimmune disease | 2015 | Japan |
| Alofisel | Allogeneic ADSCs | Crohn’s Fistula | 2018 | European |
| BMSCs products | CardioRel | Autologous BMSCs | Myocardial Infarction | 2010 | India |
| Cellgram | Autologous BMSCs | Acute Myocardial Infarction | 2011 | Korea |
| Hearticellgram | Autologous BMSCs | Acute myocardial infarction | 2011 | Korea |
| Prochymal | Allogeneic BMSCs | Acute GVHD | 2012 | Canada |
| NeuroNata-R | Autologous BMSCs | Amyotrophic Lateral Sclerosis | 2014 | Korea |
| TEMCELL | Allogeneic BMSCs | Acute GVHD | 2015 | Japan |
| Stempeucel | Allogeneic BMSCs | Thromboangiitis Obliterans | 2015 | European |
| Stemirac | Autologous BMSCs | Spinal cord injury | 2018 | Japan |
